# Supplementary material for: Model Organisms Facilitate Rare Disease Diagnosis and Therapeutic Research
Source: PubMed Central journal article supplement (PMC5586389; doi:10.1534/genetics.117.203067), 2017-08-31
Supplement: 9FileS1.pdf [file 9FileS1.pdf]

**\*\*MEMBERS OF THE UDN (163)**

|                          |                              |                      |
|--------------------------|------------------------------|----------------------|
| David R. Adams           | Neil A. Hanchard             | Jeanette C. Papp     |
| Mercedes E. Alejandro    | Lori H. Handley              | Neil H. Parker       |
| Patrick Allard           | Matthew R. Herzog            | Loren DM. Pena       |
| Euan A. Ashley           | Ingrid A. Holm               | John A. Phillips III |
| Mahshid S. Azamian       | Ellen M. Howerton            | Jennifer E. Posey    |
| Carlos A. Bacino         | Howard J. Jacob              | John H. Postlethwait |
| Ashok<br>Balasubramanyam | Mahim Jain                   | Lorraine Potocki     |
| Hayk Barseghyan          | Yong-hui Jiang               | Barbara N. Pusey     |
| Alan H. Beggs            | Jean M. Johnston             | Rachel B. Ramoni     |
| Hugo J. Bellen           | Angela L. Jones              | Amy K. Robertson     |
| Jonathan A. Bernstein    | David M. Koeller             | Lance H. Rodan       |
| Anna Bican               | Isaac S. Kohane              | Jill A. Rosenfeld    |
| David P. Bick            | Jennefer N. Kohler           | Susan L. Samson      |
| Camille L. Birch         | Donna M. Krasnewich          | Kelly Schoch         |
| Braden E. Boone          | Elizabeth L. Krieg           | Molly C. Schroeder   |
| Bret L. Bostwick         | Joel B. Krier                | Daryl A. Scott       |
| Lauren C. Briere         | Jennifer E. Kyle             | Prashant Sharma      |
| Donna M. Brown           | Seema R. Lalani              | Vandana Shashi       |
| Matthew Brush            | C. Christopher Lau           | Edwin K. Silverman   |
| Elizabeth A. Burke       | Jozef Lazar                  | Janet S. Sinsheimer  |
| Lindsay C. Burrage       | Brendan H. Lee               | Ariane G. Soldatos   |
| Shan Chen                | Hane Lee                     | Rebecca C. Spillmann |
| Gary D. Clark            | Shawn E. Levy                | Kimberly Splinter    |
| Joy D. Cogan             | Richard A. Lewis             | Joan M. Stoler       |
| Cynthia M. Cooper        | Sharyn A. Lincoln            | Nicholas Stong       |
| William J. Craigen       | Allen Lipson                 | Kimberly A. Strong   |
| Mariska Davids           | Sandra K. Loo                | Jennifer A. Sullivan |
| Jyoti G. Dayal           | Joseph Loscalzo              | David A. Sweetser    |
| Esteban C. Dell'Angelica | Richard L. Maas              | Cynthia J. Tifft     |
| Shweta U. Dhar           | Ellen F. Macnamara           | Camilo Toro          |
| Ani Dillon               | Calum A. MacRae              | Alyssa A. Tran       |
| Katrina M. Dipple        | Valerie V. Maduro            | Tiina K. Urv         |
| Laurel A. Donnell-Fink   | May Christine V.<br>Malicdan | Zaheer M. Valivullah |
| Naghmeh Dorrani          | Laura A. Mamounas            | Eric Vilain          |
| Daniel C. Dorset         | Teri A. Manolio              | Tiphanie P. Vogel    |
| Emilie D. Douine         | Thomas C. Markello           | Daryl M. Waggott     |

|                           |                           |                             |
|---------------------------|---------------------------|-----------------------------|
| David D. Draper           | Julian A. Martínez-Agosto | Colleen E. Wahl             |
| Annika M. Dries           | Paul Mazur                | Nicole M. Walley            |
| David J. Eckstein         | Allyn McConkie-Rosell     | Chris A. Walsh              |
| Lisa T. Emrick            | Alexa T. McCray           | Michael F. Wangler          |
| Christine M. Eng          | Thomas O. Metz            | Patricia A. Ward            |
| Ascia Eskin               | Matthew Might             | Katrina M. Waters           |
| Cecilia Esteves           | Paolo M. Moretti          | Bobbie-Jo M. Webb-Robertson |
| Tyra Estwick              | John J. Mulvihill         | Monte Westerfield           |
| Paul G. Fisher            | Jennifer L. Murphy        | Matthew T. Wheeler          |
| Brent L. Fogel            | Donna M. Muzny            | Anastasia L. Wise           |
| William A. Gahl           | Michele E. Nehrebecky     | Lynne A. Wolfe              |
| Rena A. Godfrey           | Stan F. Nelson            | Elizabeth A. Worthey        |
| David B. Goldstein        | J. Scott Newberry         | Shinya Yamamoto             |
| Sarah E. Gould            | John H. Newman            | Yaping Yang                 |
| Jean-Philippe F. Gourdine | Sarah K. Nicholas         | Guoyun Yu                   |
| Catherine A. Groden       | Donna Novacic             | Allison Zheng               |
| Andrea L. Gropman         | Jordan S. Orange          | Patricia A. Zornio          |
| Melissa Haendel           | J. Carl Pallais           |                             |
| Rizwan Hamid              | Christina GS. Palmer      |                             |
